# Supplementary material for: Integrated Expression Profiles of mRNA and miRNA in Polarized Primary Murine Microglia
Source: PLoS One. 2013 Nov 11;8(11):e79416. doi: 10.1371/journal.pone.0079416 (PMC3823621; doi:10.1371/journal.pone.0079416)
Supplement: Table S2 — LPS miRNA Correlation Analysis Summary. (XLSX) [file pone.0079416.s005.xlsx]

## Sheet: Sheet1
Supplemental Table S2 - LPS miRNA Correlation Analysis Summary
miRNA	Corrleated Genes	TargetScan/ TarBase	miRanda	Non-correlated but common between Ingenuity/miRanda	Ingenuity w/Correlated genes	miRanda w/Correlated genes	Common Correlated Genes	Percent Target from Ingenity Correlated genes (%)	Percent Target from miRanda Correlated genes (%)	Percent Target from Common Correlated genes (%)
mmu-miR-155	4231	1081	3329	225	173	609	112	6.736	17.0409	2.64713
mmu-miR-297b-5p	4232	1037	4050	205	171	760	80	5.931	19.8488	1.89036
mmu-miR-302c	3942	951	n/a	n/a	223	n/a	0	5.65703	n/a	5.65703
mmu-miR-10b	4227	579	2322	97	94	460	36	3.07547	11.7341	0.851668
mmu-miR-495	2964	2831	7861	1000	219	789	253	15.9244	35.1552	8.53576
mmu-miR-7a	3558	1108	3692	238	137	600	77	6.01461	19.0275	2.16414
mmu-miR-376a	1279	980	n/a	n/a	64	n/a	0	5.00391	n/a	5.00391
mmu-miR-539	2563	1935	5538	568	148	522	98	9.59813	24.1904	3.82364
mmu-miR-876-5p	3050	1049	3217	150	102	437	54	5.11475	16.0984	1.77049
mmu-miR-124	4136	1862	3327	554	245	516	289	12.911	19.4632	6.98743
mmu-miR-2132	3945	n/a	451	n/a	n/a	91	n/a	n/a	20.1774	2.30672
mmu-miR-2133	3961	n/a	113	n/a	n/a	22	n/a	n/a	19.469	0.555415
mmu-miR-143	3930	1085	3440	203	141	572	81	5.64885	16.6158	2.06107
mmu-miR-219	3827	538	1654	118	79	271	47	3.2924	8.30938	1.22812
mmu-miR-700	4153	120	111	31	23	7	16	0.93908	6.30631	0.385264
mmu-miR-689	4006	n/a	462	n/a	n/a	110	n/a	n/a	23.8095	2.74588
mmu-miR-1901	4199	n/a	147	n/a	n/a	34	n/a	n/a	23.1293	0.809717
mmu-miR-466b-3p	4170	447	6033	174	54	1032	99	3.66906	17.1059	2.3741
mmu-miR-192	3919	456	1586	66	64	305	24	2.24547	8.395	0.612401
mmu-miR-383	3604	618	2995	112	83	516	34	3.24639	15.2608	0.943396
mmu-miR-3474	4219	218	3467	99	35	677	37	1.70657	19.527	0.876985
mmu-miR-1928	4199	900	2259	176	111	434	80	4.5487	19.212	1.90522
							Average %	5.62572	17.9938	2.55163
							Std Dev of %	3.82249	6.43559	2.18503
