# Supplementary material for: Integrated Expression Profiles of mRNA and miRNA in Polarized Primary Murine Microglia
Source: PLoS One. 2013 Nov 11;8(11):e79416. doi: 10.1371/journal.pone.0079416 (PMC3823621; doi:10.1371/journal.pone.0079416)
Supplement: Table S5 — IL-4 miRNA Targeting Systems Analysis Summary. (XLSX) [file pone.0079416.s008.xlsx]

## Sheet: Sheet1
Supplemental Table S5: miRNAs associated with IL-4 stimulation - Targeting Systems Analysis Summary
miRNA	Key Functions Rregulated	-log (Power)	Key Pathways regulated	-log (Power)	Key Transcription Factors	-log (Power)
mmu-miR-449a	Cell Cycle	4.86328	Telomerase Signaling	2.01	AHR	3.63827
	Humoral Immune Response	4.86328	Cardiac β-adrenergic Signaling	1.78	USF2	3.18376
	Cancer	4.64016	Regulation of eIF4 and p70S6K Signaling	1.7	EZH2	2.99568
	Cellular Development	4.64016	Wnt/β-catenin Signaling	1.57	RUNX3	2.84466
	Immunological Disease	4.64016	ILK Signaling	1.53	Ahr-aryl hydrocarbon-RelA	2.64207
	Cardiovascular System Development and Function	4.08566	ERK/MAPK Signaling	1.5	PRDM16	2.64207
mmu-miR-145	Cellular Growth and Proliferation	4.89279	Endothelin-1 Signaling	2.92	ETS1	4.01144
	Cardiovascular System Development and Function	4.79048	P2Y Purigenic Receptor Signaling Pathway	2.33	HOXB4	3.383
	Organismal Development	4.79048	Cellular Effects of Sildenafil (Viagra)	2.22	NR2E1	2.58838
	Embryonic Development	4.61261	Glioblastoma Multiforme Signaling	2.05	Ahr-aryl hydrocarbon-RelA	2.45842
	Tissue Morphology	4.61261	Protein Kinase A Signaling	1.96	TCF4-CTNNβ	2.45842
	Hematological System Development and Function	4.284	PPARα/RXRα Activation	1.93	CNBP	2.45842
	Humoral Immune Response	4.21112	Wnt/β-catenin Signaling	1.92	E2F2	2.41117
	Inflammatory Response	4.08778	Role of NFAT in Cardiac Hypertrophy	1.84	ID3 (includes EG:15903)	2.37986
mmu-miR-297b-5p	Cardiovascular System Development and Function	4.53611	VEGF Family Ligand-Receptor Interactions	3.14	EDF1	2.20551
	Cellular Development	4.53611	AMPK Signaling	2.29	ARNT	2.19586
	Hematological System Development and Function	4.53611	G Protein Signaling Mediated by Tubby	1.94	SALL1	1.90658
	Hematopoiesis	4.53611	mTOR Signaling	1.78	ATF4	1.82974
	Organismal Development	4.53611	Role of Tissue Factor in Cancer	1.68	HOXB7	1.73049
	Cell Morphology	4.06098	Gα12/13 Signaling	1.62	EPAS1	1.63451
	Cellular Function and Maintenance	4.06098	Synaptic Long Term Depression	1.55	Meg3	1.6073
mmu-miR-214	Cellular Movement	5.04048	Insulin Receptor Signaling	2	IRF8	2.36251
	Connective Tissue Development and Function	5.04048	Lysine Biosynthesis	1.94	TP53 (includes EG:22059)	2.30627
	Skeletal and Muscular System Development and Function	5.04048	Hematopoiesis from Multipotent Stem Cells	1.86	Rar	2
	Cell Death	4.81816	Aminophosphonate Metabolism	1.6	NFAT5	1.767
	Cell-To-Cell Signaling and Interaction	4.34104	Role of Osteoblasts, Osteoclasts and Chondrocytes in Rheumatoid Arthritis	1.53	SMAD5	1.767
	Tissue Development	4.34104	Methionine Metabolism	1.47	NFIC	1.767
	Cellular Growth and Proliferation	4.2636	Role of CHK Proteins in Cell Cycle Checkpoint Control	1.39	NPM1	1.73049
	Hematopoiesis	4.2636	Nitrogen Metabolism	1.35	MDM2	1.69897
	Immunological Disease	4.03198	Hematopoiesis from Pluripotent Stem Cells	1.28	ESRRB	1.69897
	Inflammatory Disease	4.03198	MSP-RON Signaling Pathway	1.27	RARB	1.61618
mmu-miR-124	Cell Death	6.97062	IL-1 Signaling	3.66	ELK4	3.2233
	Cell Morphology	6.82391	CXCR4 Signaling	3.4	NCOA3	2.58004
	Cancer	6.1986	Molecular Mechanisms of Cancer	3.32	NFE2L2	2.44249
	Tissue Development	5.91721	IL-8 Signaling	2.96	Stat1 dimer	2.30715
	Cellular Development	5.58503	Axonal Guidance Signaling	2.35	PAX7	2.29671
	Embryonic Development	5.53313	Fatty Acid Elongation in Mitochondria	2.31	PIAS3	2.13727
	Organ Development	5.53313	Inositol Phosphate Metabolism	2.19	EGR4	2
	Organismal Development	5.53313	HMGB1 Signaling	2.17	TARDBP	1.64207
	Tissue Morphology	5.33724	Breast Cancer Regulation by Stathmin1	2.11	LIMD1	1.64207
	Lymphoid Tissue Structure and Development	5.28067	Signaling by Rho Family GTPases	2.07	KLF11	1.64207
	Organ Morphology	5.18376	Cholecystokinin/Gastrin-mediated Signaling	2.04	FOSL1	1.56067
	Gene Expression	5.15428	BMP signaling pathway	2	RBPJ	1.41454
mmu-miR-2133	Behavior	3.36754	Butanoate Metabolism	2.54	HSF2	3.78516
	Cell Morphology	3.12552	Nicotinate and Nicotinamide Metabolism	2.07	MED30	3.34294
	Cellular Assembly and Organization	3.12552	RhoA Signaling	2	POU3F2	2.26922
	Embryonic Development	3.12552	Role of Tissue Factor in Cancer	2	PPARG	2.04287
	Nervous System Development and Function	3.12552	Synthesis and Degradation of Ketone Bodies	1.81	AHR	1.98716
	Antigen Presentation	2.85078	Inositol Phosphate Metabolism	1.74	POU3F3	1.84466
	Antimicrobial Response	2.85078	Ephrin Receptor Signaling	1.65	PPARα-RXRα	1.66959
	Carbohydrate Metabolism	2.85078	IL-8 Signaling	1.64	NCOA6	1.66959
	Cardiovascular Disease	2.85078	RhoGDI Signaling	1.64	ESRRB	1.6038
	Cell-To-Cell Signaling and Interaction	2.85078	Actin Cytoskeleton Signaling	1.46	CALR	1.51999
	Energy Production	2.85078	Signaling by Rho Family GTPases	1.41	n/a	n/a
	Inflammatory Response	2.85078	Role of RIG1-like Receptors in Antiviral Innate Immunity	1.34	n/a	n/a
mmu-miR-2132	Cellular Development	4.96658	HER-2 Signaling in Breast Cancer	2.31	EPAS1	2.85699
	Cellular Growth and Proliferation	4.96658	VEGF Family Ligand-Receptor Interactions	2.31	CREB5	2.23136
	Hematological System Development and Function	4.96658	Role of JAK family kinases in IL-6-type Cytokine Signaling	2.24	BRD8	2.23136
	Hematopoiesis	4.96658	RAR Activation	2.14	RFC1	2.23136
	Lymphoid Tissue Structure and Development	4.96658	Oncostatin M Signaling	1.98	ARNT2	2.17005
	Hepatic System Development and Function	4.70774	Rac Signaling	1.94	SOX9	2.10237
mmu-miR-762	Cancer	2.80967	Crosstalk between Dendritic Cells and Natural Killer Cells	2.24	Rar	1.90309
	Cardiovascular Disease	2.80967	Synaptic Long Term Potentiation	1.96	IRF5	1.84466
	Cell Death	2.80967	Lysine Biosynthesis	1.86	NR2E1	1.41005
	Cellular Development	2.80967	CREB Signaling in Neurons	1.56	HMGB1	1.33913
	Cellular Growth and Proliferation	2.80967	Aminophosphonate Metabolism	1.51
	Endocrine System Development and Function	2.80967	Antiproliferative Role of TOB in T Cell Signaling	1.4
	Hematological Disease	2.80967	Methionine Metabolism	1.39
	Hematological System Development and Function	2.80967	cAMP-mediated signaling	1.39
mmu-miR-1224	Amino Acid Metabolism	3.15181	N-Glycan Degradation	1.76	SKIL	2.36552
	Molecular Transport	3.15181	Axonal Guidance Signaling	1.56	PIAS2	2.26922
	Organismal Injury and Abnormalities	3.15181	CNTF Signaling	1.45	ATF3	1.62893
	Small Molecule Biochemistry	3.15181	IL-10 Signaling	1.34	Notch	1.55752
	Cell Morphology	2.85078	Caveolar-mediated Endocytosis Signaling	1.31	FOS	1.4908
